# Supplementary material for: Proteomic Profiling of the Liver, Hepatic Lymph Nodes, and Spleen of Buffaloes Infected with Fasciola gigantica
Source: MDPI journal article supplement (doi:10.3390/pathogens9120982), 2020-11-24
Supplement: s1 [file s1]

Liver\_3 dpi

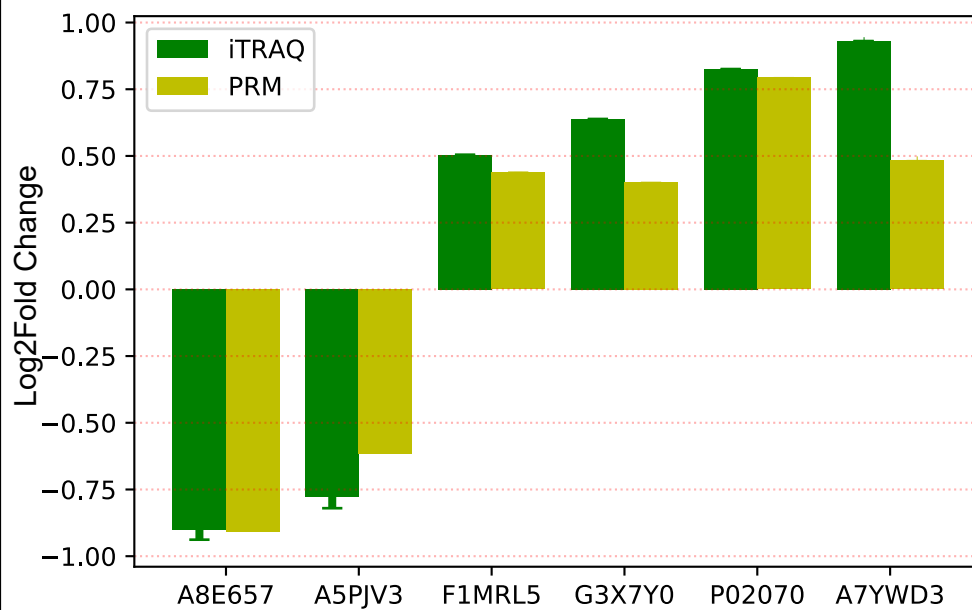

A8E657: Alpha-aminoadipic semialdehyde synthase (mitochondrial)

A5PJV3: Probable imidazolonepropionase

F1MRL5: UDP-glucuronosyltransferase

G3X7Y0: Interferon induced protein 44

P02070: Hemoglobin subunit beta

A7YWD3: UDP-glucuronosyltransferase

hLNs\_42 dpi

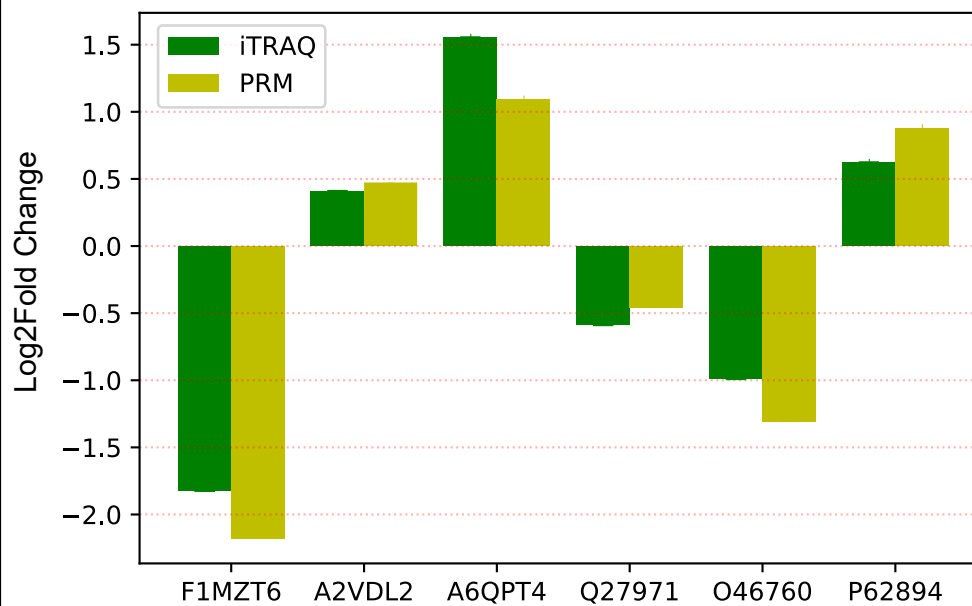

F1MZT6: Chromosome 3 C1orf50 homolog

A2VDL2: Solute carrier family 2 (Facilitated glucose transporter)

A6QPT4: MPO protein

Q27971: Calpain-2 catalytic subunit

O46760: MHC class I heavy chain

P62894: Cytochrome c

Spleen\_3 dpi

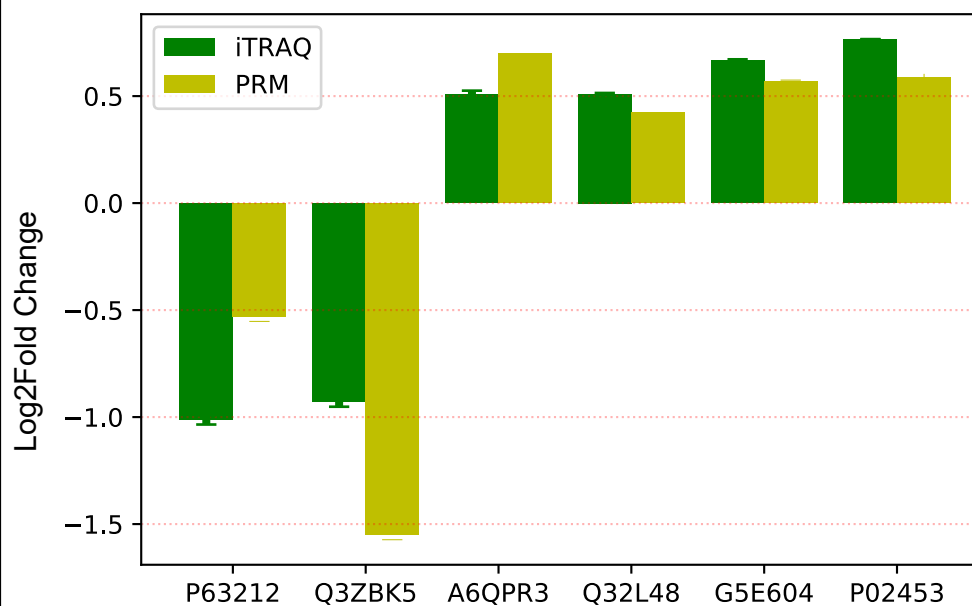

P63212: Guanine nucleotide-binding protein G(I)/G(S)/G(O) subunit gamma-2

Q3ZBK5: Tumor necrosis factor alpha-induced protein 8-like protein 2

A6QPR3: SORBS2 protein

Q32L48: Histone H2B type 1-N

G5E604: Ig-like domain-containing protein

P02453: Collagen alpha-1(I) chain
