# Supplementary figures and images for: Proteomic Profiling of the Liver, Hepatic Lymph Nodes, and Spleen of Buffaloes Infected with Fasciola gigantica
Source: MDPI journal article supplement (doi:10.3390/pathogens9120982), 2020-11-24

CV Cumulative Curve (Liver)

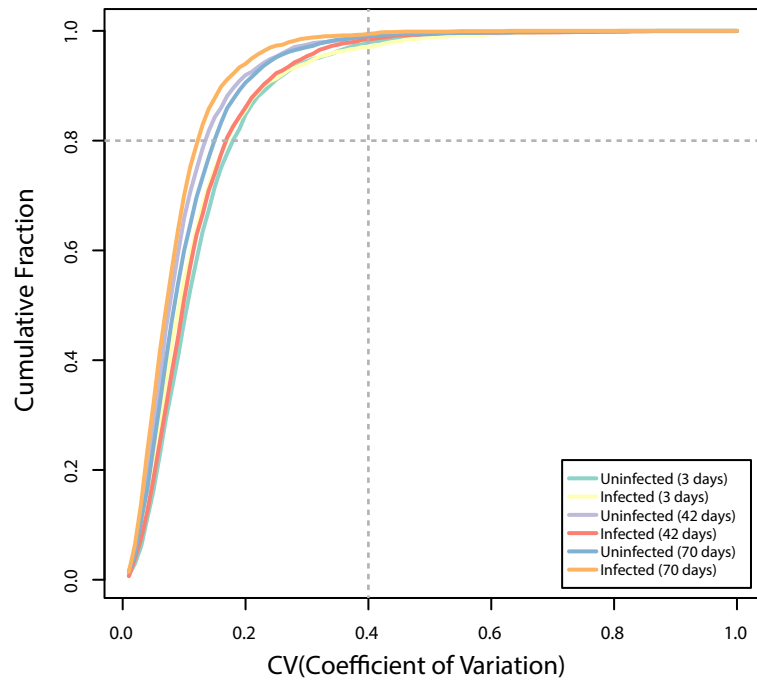

CV Cumulative Curve (hLNs)

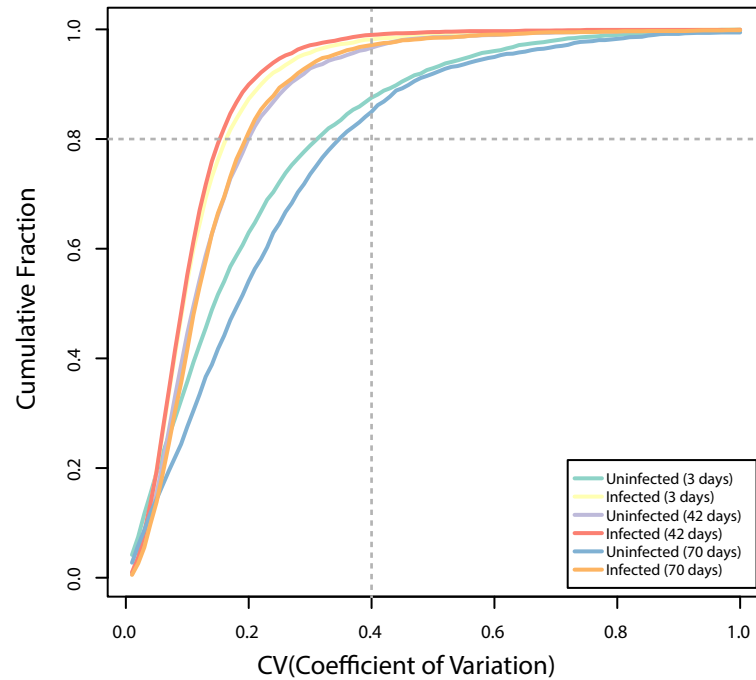

CV Cumulative Curve (Spleen )

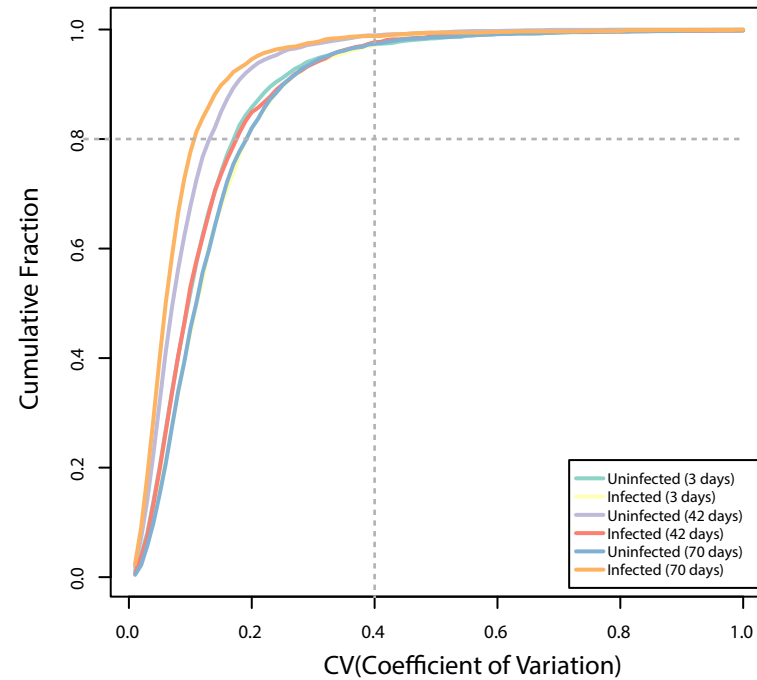

Supplement: s1 [file s1]
